# Supplementary material for: Assessment of circulating extracellular vesicles from calorie‐restricted mice and humans in ischaemic injury models
Source: PubMed Central journal article supplement — J Extracell Biol. 2023 May 17;2(5):e86. doi: 10.1002/jex2.86 (PMC11080834; doi:10.1002/jex2.86), 2023-05-17
Supplement: JEX2-2-e86-s001.pdf [file JEX2-2-e86-s001.pdf]

# Assessment of circulating extracellular vesicles from calorie restricted mice and humans in ischaemic injury models

Manuel S.V. Jaimes<sup>1,§</sup>, Chia-Te Liao<sup>2,3,4,§</sup>, Max M. Chen<sup>1</sup>, Andreas Czosseck<sup>1</sup>, Tsung-Lin Lee<sup>2</sup> Yu-Hsiang Chou<sup>5</sup>, Yung-Ming Chen<sup>5</sup>, Shuei-Liong Lin<sup>5,6</sup>, James J. Lai<sup>7,8</sup> and David J. Lundy<sup>1,9,10\*</sup>

1. Graduate Institute of Biomedical Materials & Tissue Engineering, Taipei Medical University, Taipei 110
2. Division of Nephrology, Department of Internal Medicine, Shuang Ho Hospital, Taipei Medical University, New Taipei City 23561, Taiwan
3. Division of Nephrology, Department of Internal Medicine, School of Medicine, College of Medicine, Taipei Medical University, Taipei, Taiwan
4. TMU Research Center of Urology and Kidney (TMU-RCUK), Taipei Medical University, Taipei, Taiwan
5. Division of Nephrology, Department of Internal Medicine, National Taiwan University Hospital, College of Medicine, National Taiwan University, Taipei, Taiwan
6. Graduate Institute of Physiology, College of Medicine, National Taiwan University, Taipei, Taiwan
7. Department of Bioengineering, University of Washington, Seattle, WA 98195, USA
8. Department of Materials Science and Engineering, National Taiwan University of Science and Technology, Taipei, Taiwan
9. International PhD Program in Biomedical Engineering, Taipei Medical University, Taipei, Taiwan, 110
10. Center for Cell Therapy, Taipei Medical University Hospital, Taipei 110, Taiwan

§ Equal contributions

\* Corresponding author

## Supplemental Materials

Supplemental Table 1: List of qPCR primers used for macrophage polarisation analysis

Supplemental Table 2: Highest expressed miRNAs detected in human serum EV samples

Supplemental Table 3: Increased/decreased miRNAs in human serum EV samples following water-only fasting

Supplemental Table 4: Predicted gene targets of differentially expressed miRNAs

Supplemental Figure 1: SDS-PAGE of serum proteins

Supplemental Figure 2: SDS-PAGE of EV proteins

Supplemental Figure 3: Kidney cell (HK-2, NRK-52E) line hypoxia and toxic injury models

Supplemental Figure 4: miRNA quality control data

| <b>Gene</b>   | <b>ID</b> | <b>Species</b> | <b>Forward primer</b>   | <b>Reverse primer</b>    |
|---------------|-----------|----------------|-------------------------|--------------------------|
| <i>Gapdh</i>  | 14433     | mouse          | CATCACTGCCACCCAGAAGACTG | ATGCCAGTGAGCTTCCCGTTCCAG |
| <i>Il10</i>   | 16153     | mouse          | CGGGAAGACAATAACTGCACCC  | CGGTTAGCAGTATGTTGTCCAGC  |
| <i>Il1b</i>   | 16176     | mouse          | TTCAGGCAGGCAGTATCACTC   | GAAGGTCCACGGGAAAGACAC    |
| <i>Nlrp3</i>  | 216799    | mouse          | ATTACCCGCCCGAGAAAGG     | CATGAGTGTGGCTAGATCCAAG   |
| <i>Il6</i>    | 16193     | mouse          | TCTATACCACTTCACAAGTCGGA | GAATTGCCATTGCACAACCTCTTT |
| <i>Tnfa</i>   | 21926     | mouse          | CAGGCGGTGCCTATGTCTC     | CGATCACCCCGAAGTTCAGTAG   |
| <i>Arg1</i>   | 11846     | mouse          | CTCCAAGCCAAAGTCCTTAGAG  | AGGAGCTGTCATTAGGGACATC   |
| <i>Irf4</i>   | 16364     | mouse          | CTTTGAGGAATTGGTCGAGAGG  | GAGAGCCATAAGGTGCTGTCA    |
| <i>Nos2</i>   | 18126     | mouse          | GTTCTCAGCCCAACAATACAAGA | GTGGACGGGTTCGATGTCAC     |
| <i>Retnla</i> | 57262     | mouse          | CCAATCCAGCTAACTATCCCTCC | ACCCAGTAGCAGTCATCCCA     |

**Supplemental Table S1.** Sequences of primers used for assessment of mouse macrophage polarisation.

| <b>miRNA ID</b> | <b>CT (average)</b> |
|-----------------|---------------------|
| hsa-miR-451a    | 21.87066083         |
| hsa-miR-223-3p  | 22.85588139         |
| hsa-miR-16-5p   | 23.29236142         |
| hsa-miR-21-5p   | 25.06708715         |
| hsa-miR-19b-3p  | 25.08065023         |
| hsa-miR-92a-3p  | 25.13799492         |
| hsa-miR-142-3p  | 25.2191205          |
| hsa-miR-23a-3p  | 25.2985377          |
| hsa-miR-19a-3p  | 25.36102776         |
| hsa-miR-486-5p  | 25.89541101         |
| hsa-miR-126-3p  | 26.00600847         |
| hsa-miR-24-3p   | 26.2453557          |
| hsa-miR-20a-5p  | 26.30825085         |
| hsa-miR-26a-5p  | 26.62005947         |
| hsa-miR-25-3p   | 26.76693549         |
| hsa-miR-27a-3p  | 26.88601213         |
| hsa-miR-15b-5p  | 26.91025456         |
| hsa-miR-103a-3p | 27.12654937         |
| hsa-let-7a-5p   | 27.13418923         |
| hsa-miR-15a-5p  | 27.13717905         |

**Supplemental Table S2.** List of top 20 highest expressed miRNAs across serum EV samples, sorted from highest to lowest expressed. miRNAs are shown if they were detected in all samples.

### Up/down-regulated miRNAs

| miRNA ID        | log2fc | <i>p</i> value | Avg. CT |
|-----------------|--------|----------------|---------|
| hsa-miR-622     | 8.68   | 0.003283       | 27.90   |
| hsa-miR-487b-3p | 2.99   | 0.032831       | 31.57   |
| hsa-miR-378a-3p | 2.29   | 0.043125       | 29.19   |
| miRNA ID        | Fold   | <i>p</i> value | Avg. CT |
| hsa-miR-760     | -6.64  | 0.002342       | 29.80   |
| hsa-miR-98-5p   | -3.05  | 0.002332       | 31.54   |
| hsa-miR-31-5p   | -2.32  | 0.012526       | 34.02   |
| hsa-miR-744-3p  | -1.09  | 0.037690       | 30.22   |
| hsa-miR-485-3p  | -1.29  | 0.048495       | 33.00   |

**Supplemental Table S3.** List of differentially-expressed miRNAs between post- and pre-fasting EV samples. The average cycle threshold (Avg. CT), significance (p-value) and log<sub>2</sub>-fold change (log<sub>2</sub>fc) are shown.

| Predicted genes regulated by decreased miRNAs |                           |                                       |                          |
|-----------------------------------------------|---------------------------|---------------------------------------|--------------------------|
| Gene Symbol                                   | # of miRNA Targeting this | Total # of Target Sites Identified in | Range of Strength Scores |
| GRIN2D                                        | 1                         | 3                                     | -0.12 -- -0.07           |
| MNT                                           | 2                         | 2                                     | -0.18 -- -0.14           |
| MPHOSPH8                                      | 2                         | 2                                     | -0.12 -- -0.07           |
| NUFIP2                                        | 2                         | 2                                     | -0.10 -- -0.10           |
| PAPOLA                                        | 2                         | 2                                     | -0.32 -- -0.23           |
| SPOPL                                         | 2                         | 2                                     | -0.22 -- -0.16           |
| TLK2                                          | 2                         | 2                                     | -0.25 -- -0.21           |

| Predicted genes regulated by increased miRNAs |                           |                                       |                          |
|-----------------------------------------------|---------------------------|---------------------------------------|--------------------------|
| Gene Symbol                                   | # of miRNA Targeting this | Total # of Target Sites Identified in | Range of Strength Scores |
| IGF2BP1                                       | 2                         | 6                                     | -0.25 -- -0.01           |
| HMG2A                                         | 1                         | 6                                     | -0.38 -- -0.10           |
| ARID3B                                        | 1                         | 5                                     | -0.24 -- -0.04           |
| PURB                                          | 3                         | 4                                     | -0.29 -- -0.01           |
| CLCN5                                         | 2                         | 4                                     | -0.29 -- -0.03           |
| LIN28B                                        | 1                         | 4                                     | -0.43 -- -0.14           |
| ANKFY1                                        | 3                         | 3                                     | -0.12 -- -0.00           |
| DAGLA                                         | 3                         | 3                                     | -0.48 -- -0.20           |
| GATAD2B                                       | 3                         | 3                                     | -0.08 -- 0.03            |
| PHC3                                          | 3                         | 3                                     | -0.39 -- -0.09           |
| SNN                                           | 3                         | 3                                     | -0.31 -- -0.09           |
| SNX1                                          | 3                         | 3                                     | -0.16 -- -0.05           |
| STX3                                          | 3                         | 3                                     | -0.41 -- -0.13           |

**Supplemental Table S4.** Predicted gene targets of differentially-expressed miRNAs. The table on the left shows predicted genes targeted by decreased (post-fasting vs. pre-fasting) miRNAs, and the table on the right shows genes targeted by increased miRNAs. Data were provided by Qiagen Geneglobe online analysis tool.

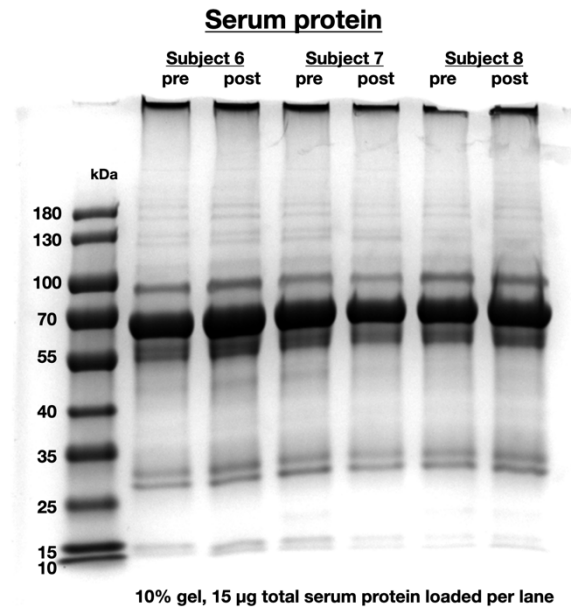

**Supplemental Figure S1.** SDS-PAGE gel showing serum protein extracts run on a 10 % polyacrylamide gel. Each lane was loaded with 15  $\mu$ g total protein.

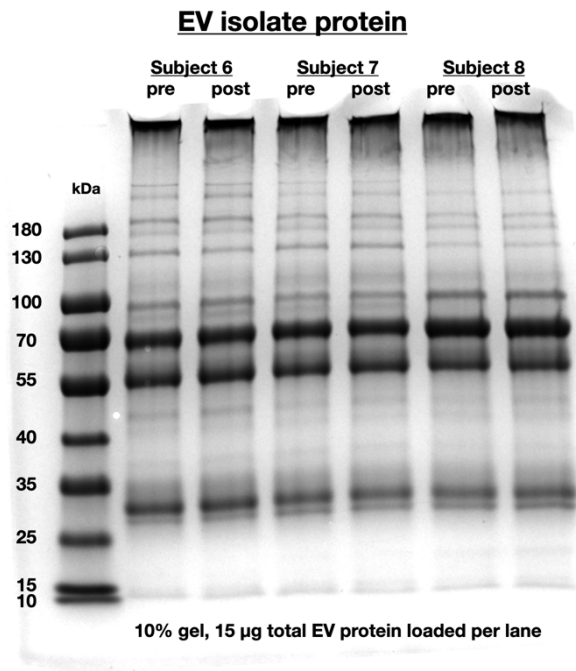

**Supplemental Figure S2.** SDS-PAGE gel showing EV protein extracts run on a 10 % polyacrylamide gel. Each lane was loaded with 15 µg total protein.

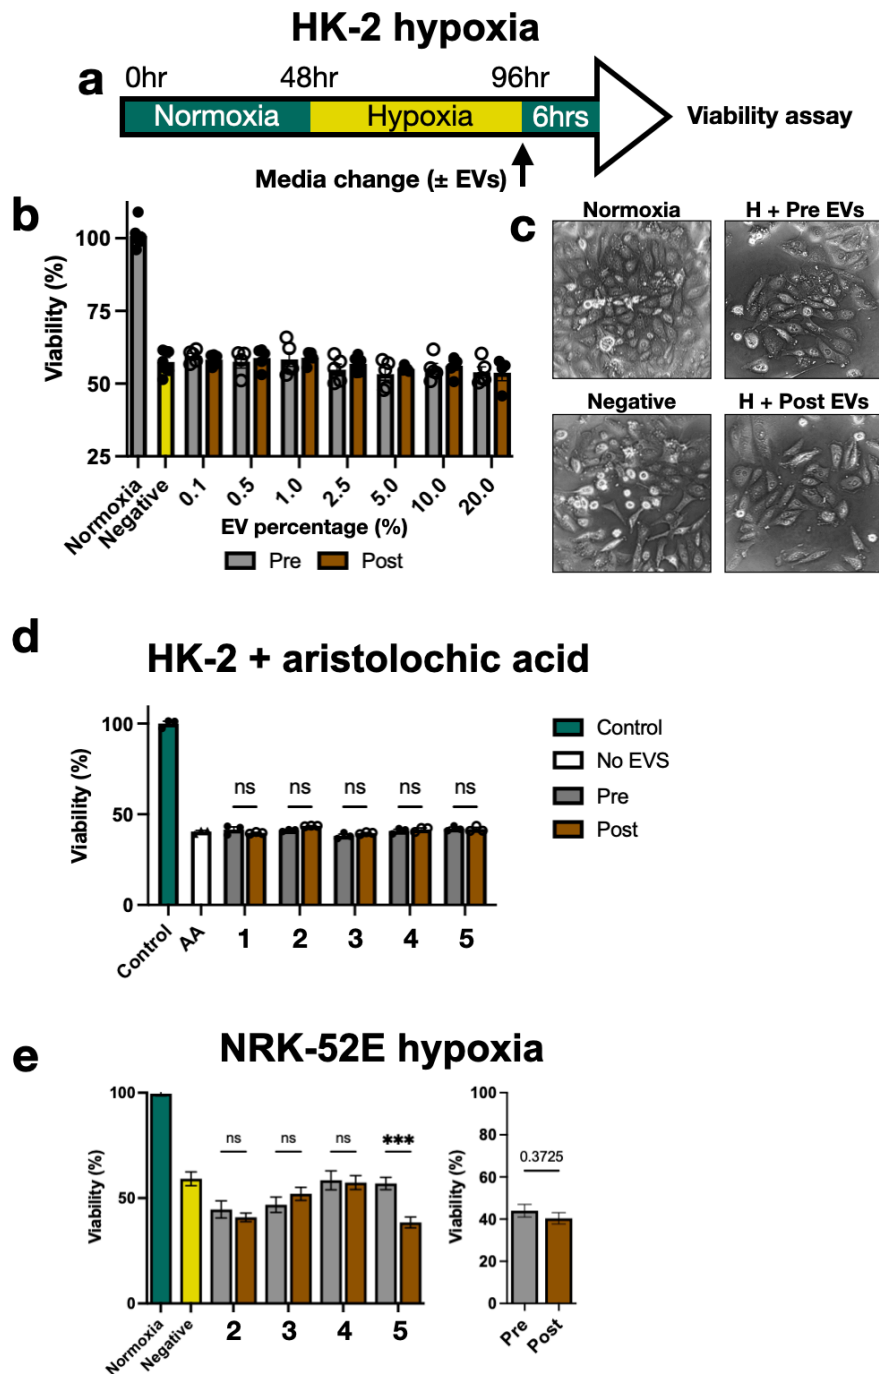

**Supplemental Figure 3.** **a.** Timeline of HK-2 hypoxia experiments. **b.** Cell viability results. **c.** cell morphology. **d.** Cell viability in toxic injury model using 30  $\mu$ g/ml aristolochic acid. **e.** Cell viability in NRK-52E hypoxia model. Nested *t*-test of all samples is shown on the right with the P value indicated. ns = not significant



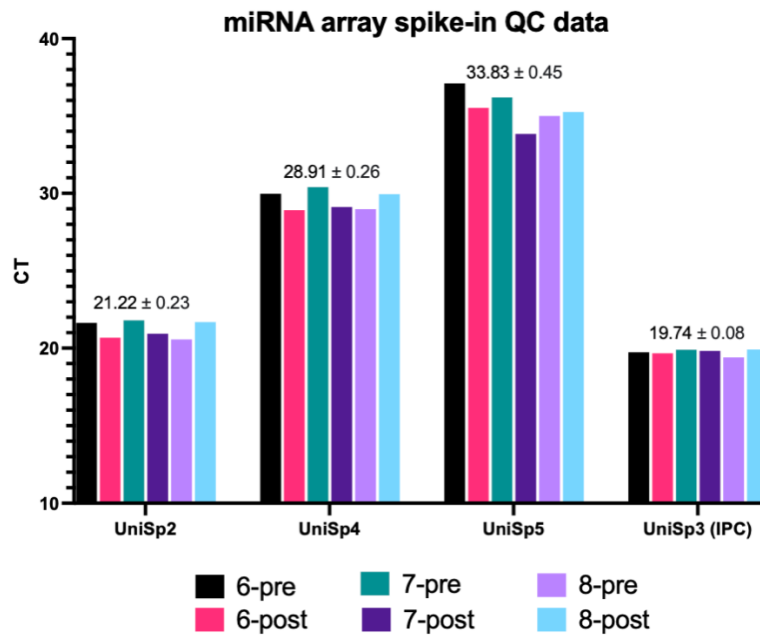

**Supplemental Figure 4.** Cycle threshold (CT) values for spike-in UniSp2, UniSp4 and UniSp5 across six samples. These spike-ins represent high, medium and low expressed miRNAs respectively. The mean inter-plate calibration (UniSp3 IPC) samples are also shown. Numbers above the graph indicate mean CT values.
